# Supplementary material for: Merkmale und Perspektiven der (psycho–)therapeutischen Behandlung im Justizvollzug
Source: Atypon-hosted journal article supplement (doi:10.1026/1616-3443/a000655), 2022-01-01
Supplement: 1616-3443_a000655_esm1.pdf [file 1616-3443_a000655_esm1.pdf]

**STANDARDBOGEN****KONTAKTDATEN der Sozialtherapeutischen Einrichtung**

|                         |                                                  |                                       |                                             |
|-------------------------|--------------------------------------------------|---------------------------------------|---------------------------------------------|
| Name                    | .....                                            |                                       |                                             |
| Adresse                 | .....<br>.....                                   |                                       |                                             |
| Website                 | .....                                            |                                       |                                             |
| Jahr der Eröffnung      | .....                                            |                                       |                                             |
| Art der Einrichtung     | Selbständige Anstalt<br><input type="checkbox"/> | Abteilung<br><input type="checkbox"/> | Sonstiges <input type="checkbox"/><br>..... |
| Geschlecht der Klientel | männlich<br><input type="checkbox"/>             | weiblich<br><input type="checkbox"/>  |                                             |
| Art der Klientel        | Ausschließlich nach JGG Verurteilte              | ja <input type="checkbox"/>           | nein <input type="checkbox"/>               |

**KONTAKTDATEN der Bearbeiterin / des Bearbeiters (für Rückfragen)**

|         |       |
|---------|-------|
| Name    | ..... |
| Telefon | ..... |
| Email   | ..... |

**Hinweise zum Ausfüllen:**

- Bitte beziehen Sie Ihre Antworten auf den Stichtag 31. März 2019 bzw. auf den Zeitraum vom 1. April 2018 bis 31. März 2019.
- Fragen mit Bezug zu einzelnen Paragraphen des StVollzG beziehen sich auch auf vergleichbare landesrechtliche Regelungen für Erwachsene und Jugendliche.
- Die Gesamtzahl der Strafgefangenen und Sicherungsverwahrten (rot markierte Felder) wird sechsmal, die der verfügbaren Plätze (blau markierte Felder) zweimal erfragt und muss jeweils übereinstimmen.
- Bitte kontrollieren Sie vor der Rücksendung noch einmal die vollständige und fehlerfreie Beantwortung aller Fragen.

Für Fragen und Anmerkungen steht Ihnen als Ansprechpartnerin zur Verfügung:

**Dr. Sonja Etzler** , Tel.: 0611 / 15758-21 (Di & Do von 09h-17h),

E-Mail: s.etzler@krimz.de

**TEIL I: STRAFGEFANGENE UND SICHERUNGSVERWAHRTE****(1) ANZAHL der verfügbaren PLÄTZE sowie der STRAFGEFANGENEN UND SICHERUNGSVERWAHRTEN am Stichtag 31.03.2019**

| Vollzugsart       | Anzahl der verfügbaren Plätze* | Anzahl der <b>Strafgefangenen und Sicherungsverwahrten</b><br><i>einschl. probeweise Aufgenommene</i><br><i>einschl. vorübergehend Abwesende nach §§ 65, 124 StVollzG (Urlaub)</i><br><i>ohne vorübergehend Anwesende nach § 125 StVollzG</i> |
|-------------------|--------------------------------|-----------------------------------------------------------------------------------------------------------------------------------------------------------------------------------------------------------------------------------------------|
| geschlossener ~   |                                |                                                                                                                                                                                                                                               |
| offener ~**       |                                |                                                                                                                                                                                                                                               |
| <b>Gesamtzahl</b> |                                |                                                                                                                                                                                                                                               |

\*Sofern Plätze für probeweise Aufzunehmende verfügbar sind, zählen Sie diese bitte mit.

\*\*Sofern – unter Fortführung der Behandlung – Plätze im offenen Vollzug (OVZ) Ihrer Hauptanstalt nach Bedarf belegt werden können, geben Sie als verfügbare Plätze im OVZ bitte „n.B.“ an und zählen evtl. am Stichtag dort untergebrachte Strafgefangene und Sicherungsverwahrte als solche im OVZ.

**(2) RÄUMLICHE GEGEBENHEITEN der Wohngruppen**

| Anzahl der Wohngruppen (WGen) insgesamt → |                               |                          |                          |                          |                                            |
|-------------------------------------------|-------------------------------|--------------------------|--------------------------|--------------------------|--------------------------------------------|
| WGen (einzeln)<br>↓                       | Anzahl der verfügbaren Plätze | Art der Unterbringung*   |                          |                          | Anzahl der WG-eigenen** Gemeinschaftsräume |
|                                           |                               | einzel                   | doppel                   | mehrfach                 |                                            |
| (1)                                       |                               | <input type="checkbox"/> | <input type="checkbox"/> | <input type="checkbox"/> |                                            |
| (2)                                       |                               | <input type="checkbox"/> | <input type="checkbox"/> | <input type="checkbox"/> |                                            |
| (3)                                       |                               | <input type="checkbox"/> | <input type="checkbox"/> | <input type="checkbox"/> |                                            |
| (4)                                       |                               | <input type="checkbox"/> | <input type="checkbox"/> | <input type="checkbox"/> |                                            |
| (5)                                       |                               | <input type="checkbox"/> | <input type="checkbox"/> | <input type="checkbox"/> |                                            |
| (6)                                       |                               | <input type="checkbox"/> | <input type="checkbox"/> | <input type="checkbox"/> |                                            |
| (7)                                       |                               | <input type="checkbox"/> | <input type="checkbox"/> | <input type="checkbox"/> |                                            |
| (8)                                       |                               | <input type="checkbox"/> | <input type="checkbox"/> | <input type="checkbox"/> |                                            |
| (9)                                       |                               | <input type="checkbox"/> | <input type="checkbox"/> | <input type="checkbox"/> |                                            |
| (10)                                      |                               | <input type="checkbox"/> | <input type="checkbox"/> | <input type="checkbox"/> |                                            |
| (11)                                      |                               | <input type="checkbox"/> | <input type="checkbox"/> | <input type="checkbox"/> |                                            |
| (12)                                      |                               | <input type="checkbox"/> | <input type="checkbox"/> | <input type="checkbox"/> |                                            |
| (13)                                      |                               | <input type="checkbox"/> | <input type="checkbox"/> | <input type="checkbox"/> |                                            |
| (14)                                      |                               | <input type="checkbox"/> | <input type="checkbox"/> | <input type="checkbox"/> |                                            |
| <b>Gesamt</b>                             |                               | ×                        | ×                        | ×                        |                                            |

\*Bitte berücksichtigen Sie dabei keine einzelnen „Notfall-(Doppel-)Zimmer“.

\*\*Bitte erfassen Sie hier keine Räume, die von mehreren Wohngruppen genutzt werden.

**Gemeinschaftsräume in der sozialtherapeutischen Einrichtung**

| <b>Bitte keine Doppelzählungen!</b> | Gemeinschaftsräume insgesamt (1) | Davon wohngruppenübergreifend von mind. 2 WGs genutzt (2)<br>(bitte nur ausfüllen, wenn mind. 2 WGs vorhanden) | Davon Nutzung mit Hauptanstalt - zeitlich getrennt (3)<br>(bitte nur ausfüllen, wenn Abteilung) | Davon Nutzung mit Hauptanstalt - zur gleichen Zeit (4)<br>(bitte nur ausfüllen, wenn Abteilung) |
|-------------------------------------|----------------------------------|----------------------------------------------------------------------------------------------------------------|-------------------------------------------------------------------------------------------------|-------------------------------------------------------------------------------------------------|
| Aufenthaltsräume                    |                                  |                                                                                                                |                                                                                                 |                                                                                                 |
| Sporträume/-plätze/-hallen          |                                  |                                                                                                                |                                                                                                 |                                                                                                 |
| Sonstige Freizeiträume              |                                  |                                                                                                                |                                                                                                 |                                                                                                 |
| Gruppenbehandlungsräume             |                                  |                                                                                                                |                                                                                                 |                                                                                                 |
| Besuchsräume                        |                                  |                                                                                                                |                                                                                                 |                                                                                                 |
| Weitere _____                       |                                  |                                                                                                                |                                                                                                 |                                                                                                 |
| Weitere _____                       |                                  |                                                                                                                |                                                                                                 |                                                                                                 |
| Weitere _____                       |                                  |                                                                                                                |                                                                                                 |                                                                                                 |

**Anmerkungen**

(1) Alle Gemeinschaftsräume, die der sozialtherapeutischen Einrichtung generell zur Verfügung stehen.

(2) Wie viele der *Gemeinschaftsräume insgesamt* von mehreren Wohngruppen genutzt werden. Bitte nur ausfüllen, wenn die sozialtherapeutische Einrichtung mindestens zwei Wohngruppen umfasst.

(3) Wie viele der *Gemeinschaftsräume insgesamt* mit der Hauptanstalt gemeinsam genutzt werden, jedoch *zeitlich getrennt*, etwa durch Nutzungszeiten ausschließlich für Strafgefangene und Sicherungsverwahrte der sozialtherapeutischen Abteilung. Bitte nur ausfüllen, wenn sozialtherapeutische Abteilung und eine Hauptanstalt vorhanden ist.

(4) Wie viele der *Gemeinschaftsräume insgesamt* mit der Hauptanstalt gemeinsam genutzt werden und *zeitlich gemeinsam* mit Strafgefangenen und Sicherungsverwahrten der Hauptanstalt. Bitte nur ausfüllen, wenn sozialtherapeutische Abteilung und eine Hauptanstalt vorhanden ist.

**(3) ALTER der Strafgefangenen und Sicherungsverwahrten am Stichtag 31.03.2019**

|                       | Anzahl der Strafgefangenen und Sicherungsverwahrten | <i>Davon:</i> Anzahl der Nicht-Deutschen |
|-----------------------|-----------------------------------------------------|------------------------------------------|
| unter 18 Jahre        |                                                     |                                          |
| 18 bis unter 21 Jahre |                                                     |                                          |
| 21 bis unter 25 Jahre |                                                     |                                          |
| 25 bis unter 30 Jahre |                                                     |                                          |
| 30 bis unter 35 Jahre |                                                     |                                          |
| 35 bis unter 40 Jahre |                                                     |                                          |
| 40 bis unter 45 Jahre |                                                     |                                          |
| 45 bis unter 50 Jahre |                                                     |                                          |
| 50 bis unter 55 Jahre |                                                     |                                          |
| 55 bis unter 60 Jahre |                                                     |                                          |
| 60 bis unter 65 Jahre |                                                     |                                          |
| ab 65 Jahre           |                                                     |                                          |
| <b>Gesamtzahl</b>     |                                                     |                                          |

**(4) DAUER DER JUGEND-/FREIHEITSSTRAFE\*\* BEI STRAFGEFANGENEN\* (laut Personal- und Vollstreckungsblatt)**

| Dauer Jugend-/ Freiheitsstrafe | Anzahl der Strafgefangenen | <i>Davon:</i> Anzahl derjenigen mit <i>zugleich</i> angeordneter bzw. vorbehaltener stationärer Maßregel |           |           |            |
|--------------------------------|----------------------------|----------------------------------------------------------------------------------------------------------|-----------|-----------|------------|
|                                |                            | § 63 StGB                                                                                                | § 64 StGB | § 66 StGB | § 66a StGB |
| bis 2 Jahre                    |                            |                                                                                                          |           |           |            |
| über 2 bis 3 Jahre             |                            |                                                                                                          |           |           |            |
| über 3 bis 4 Jahre             |                            |                                                                                                          |           |           |            |
| über 4 bis 5 Jahre             |                            |                                                                                                          |           |           |            |
| über 5 bis 7 Jahre             |                            |                                                                                                          |           |           |            |
| über 7 bis 10 Jahre            |                            |                                                                                                          |           |           |            |
| über 10 bis 15 Jahre           |                            |                                                                                                          |           |           |            |
| lebenslang                     |                            |                                                                                                          |           |           |            |
| <b>Gesamtzahl</b>              |                            |                                                                                                          |           |           |            |

\* Bitte berücksichtigen Sie NUR die Strafgefangenen

\*\*Dabei handelt es sich um die Dauer jener vom Gericht verhängten Jugend-/Freiheitsstrafe, die am Stichtag 31.03.2018 vollstreckt wird.

Bitte kürzen Sie diese Dauer nicht um schon verbüßte Zeiten und verlängern Sie sie nicht um noch offene Jugend-/Freiheitsstrafen.

**(5) DAUER DER JUGEND-/FREIHEITSSTRAFE\*\* BEI SICHERUNGSVERWAHRTEN in Unterbringung\* (laut Personal- und Vollstreckungsblatt)**

| Dauer Jugend-/<br>Freiheitsstrafe | Anzahl der<br>Sicherungs-<br>verwahrten | Davon: Anzahl der angeordneten bzw. vorbehaltenen<br>stationärer Maßregel |            |           |           |
|-----------------------------------|-----------------------------------------|---------------------------------------------------------------------------|------------|-----------|-----------|
|                                   |                                         | § 66 StGB                                                                 | § 66a StGB | § 63 StGB | § 64 StGB |
| bis 2 Jahre                       |                                         |                                                                           |            |           |           |
| über 2 bis 3 Jahre                |                                         |                                                                           |            |           |           |
| über 3 bis 4 Jahre                |                                         |                                                                           |            |           |           |
| über 4 bis 5 Jahre                |                                         |                                                                           |            |           |           |
| über 5 bis 7 Jahre                |                                         |                                                                           |            |           |           |
| über 7 bis 10 Jahre               |                                         |                                                                           |            |           |           |
| über 10 bis 15 Jahre              |                                         |                                                                           |            |           |           |
| lebenslang                        |                                         |                                                                           |            |           |           |
| <b>Gesamtzahl</b>                 |                                         |                                                                           |            |           |           |

\*Bitte berücksichtigen Sie NUR die Sicherungsverwahrten in Unterbringung

\*\*Dabei handelt es sich um die Dauer jener vom Gericht verhängten Jugend-/Freiheitsstrafe, die zusammen mit der angeordneten bzw. vorbehaltenen Maßregel verhängt worden war.

Bitte kürzen Sie diese Dauer nicht um schon verbüßte Zeiten und verlängern Sie sie nicht um noch offene Jugend-/Freiheitsstrafen.

**(6) VORSTRAFEN der Strafgefangenen und Sicherungsverwahrten (laut Personal- und Vollstreckungsblatt)**

| Anzahl der<br>Vorstrafen | Anzahl der Strafgefangenen<br>und Sicherungsverwahrten |
|--------------------------|--------------------------------------------------------|
| keine Vorstrafen         |                                                        |
| 1 oder 2                 |                                                        |
| 3 oder 4                 |                                                        |
| 5 oder 6                 |                                                        |
| 7 oder 8                 |                                                        |
| 9 oder 10                |                                                        |
| 11 bis 15                |                                                        |
| über 15                  |                                                        |
| <b>Gesamtzahl</b>        |                                                        |

**(7) DELIKTSCHWERPUNKT: schwerste Straftat (einschl. strafbarer Versuche), die dem Straf- bzw. Maßregelvollzug am Stichtag 31.03.2019 zugrunde liegt**  
(bitte keine Doppelzählungen mit Ausnahme 1.1.)

|                                                                                                                            | Anzahl der<br>Strafgefangenen und<br>Sicherungsverwahrten |
|----------------------------------------------------------------------------------------------------------------------------|-----------------------------------------------------------|
| 1.1 sexuelle Nötigung, Vergewaltigung (§ 177)                                                                              |                                                           |
| - 1.1.a) davon: auch nach §§ 176, 176a verurteilt                                                                          |                                                           |
| - 1.1.b) davon: auch nach §§ 174, 179 verurteilt                                                                           |                                                           |
| 1.2 sexueller Missbrauch von Kindern (§§ 176, 176a)                                                                        |                                                           |
| 1.3 sonstiger sexueller Missbrauch (§§ 174, 174a/b/c, 179, 182)<br>(bitte mit Nennung des jeweiligen Paragraphen)          | §<br>§                                                    |
| 1.4 sonstiges Sexualdelikt (§§ 180-181a, 183-184g)<br>(bitte mit Nennung des jeweiligen Paragraphen)                       | §<br>§                                                    |
| 2.1 Mord (§ 211)                                                                                                           |                                                           |
| 2.2 Totschlag, Delikte mit Todesfolge (§§ 212, 213, 176b, 178, 227 etc.)<br>(bitte mit Nennung des jeweiligen Paragraphen) | §<br>§                                                    |
| 3.1 Raub und Erpressung (§§ 249-250, 252-255)                                                                              |                                                           |
| 3.2 Diebstahl mit Waffen, Wohnungseinbruchdiebstahl,<br>(schwerer) Bandendiebstahl (§§ 244, 244a)                          |                                                           |
| 3.3 sonstiges Eigentumsdelikt (§§ 242-243, 246-248c)                                                                       |                                                           |
| 3.4 Betrug und Untreue (§§ 263-266b)                                                                                       |                                                           |
| 3.5 Urkundenfälschung (§ 267)                                                                                              |                                                           |
| 4.1 schwere Körperverletzung (§ 226)                                                                                       |                                                           |
| 4.2 sonstige Körperverletzung (§§ 223-225, 229)                                                                            |                                                           |
| 4.3 Freiheitsberaubung (§ 239)                                                                                             |                                                           |
| 4.4 ([besonders] schwere) Brandstiftung (§§ 306-306b)                                                                      |                                                           |
| 4.5 schweres Betäubungsmitteldelikt (§§ 29 III, 29a-30b BtMG)                                                              |                                                           |
| 4.6 einfaches Betäubungsmitteldelikt (§ 29 I BtMG)                                                                         |                                                           |
| 4.7 Vollrausch (§ 323a)<br>(bitte mit Nennung der Rauschtat)                                                               | §<br>§                                                    |
| 4.8 sonstiges Delikt<br>(bitte mit Nennung des jeweiligen Paragraphen)                                                     | §<br>§                                                    |
| <b>Gesamtzahl</b>                                                                                                          |                                                           |

**(8) ZUGÄNGE in der Zeit vom 01.04.2018 bis 31.03.2019**

Gesamtzahl der Aufnahmen

**Anmerkungen****(9) LOCKERUNGEN: höchste zugelassene Lockerungsstufe am Stichtag 31.03.2019**  
(bitte keine Doppelzählungen!)Anzahl der  
Strafgefangenen und  
Sicherungsverwahrten

keine Zulassung zu Lockerungen

Ausführung

Ausgang (einschl. begleiteter Ausgang), Urlaub

Freigang (z.B. § 11 StVollzG)

Urlaub zur Vorbereitung der Entlassung (z.B. § 15 Abs. 4 StVollzG )

Sonderurlaub für Sozialtherap. Einrichtungen (z.B. § 124 StVollzG)

**Gesamtzahl****Anmerkungen****Ist in Ihrer Einrichtung die Durchführung von Lockerungen aus konzeptionellen, personellen, baulichen oder sonstigen Gründen generell ausgeschlossen?**Ja, schon Ausführungen Ja, erst selbständige Lockerungen nein **Anmerkungen**

**(10) ABGÄNGE in der Zeit vom 01.04.2018 bis 31.03.2019**

|                                                                               |  |
|-------------------------------------------------------------------------------|--|
| 1. Anzahl Entlassungen zum Strafende                                          |  |
| 2. Anzahl vorzeitige Entlassungen aus Strafhaft                               |  |
| 3. Anzahl Aussetzungen/Erledigungen der Sicherungsverwahrung                  |  |
| 4. Kontrolle: Summe aller Entlassungen (Punkt 1 bis 3)                        |  |
| 5. Anzahl Verlegungen (gem. Behandlungsplan)                                  |  |
| 6. Anzahl Rückverlegungen auf Antrag des Strafgefangenen/Sicherungsverwahrten |  |
| 7. Anzahl Rückverlegungen durch Anstalt                                       |  |
| 8. Anzahl sonstige Abgänge (bitte spezifizieren)<br>.....                     |  |
| <b>Kontrolle: Summe aller Abgänge (Punkt 4 bis 8)</b>                         |  |

**Anmerkungen**

\*Bitte zählen Sie einen „Abgang“ zum Zweck der (in Ihrer Einrichtung nicht möglichen) Durchführung von Lockerungen bzw. die Verlegung in den OVZ einer anderen JVA oder Ihrer Hauptanstalt, sofern damit die sozialtherapeutische Behandlung durch Ihre Einrichtung endet, als „Verlegung (gem. Behandlungsplan)“.

**(11) NACHBETREUUNG von Entlassenen in der Zeit vom 01.04.2018 bis 31.03.2019**

|                                                                                |  |
|--------------------------------------------------------------------------------|--|
| Gesamtzahl der freiwilligen Aufnahmen (z.B. gem. § 125 StVollzG)               |  |
| Gesamtzahl der nachgehenden Betreuungen (z.B. gem. § 126 StVollzG)             |  |
| - Davon zwischen 01.04.17 bis 31.03.18 neu begonnenen nachgehenden Betreuungen |  |

**Anmerkungen**



**TEIL II: PERSONAL****(12) PERSONAL AUSSTATTUNG am Stichtag 31.03.2018**

|                                                                                       | Verfügbare Stellen* | Besetzte Stellen* | Besetzte Stellen durch<br>(bitte auch anteilig angeben) |         | Längerfristig<br>abwesend<br>*** |
|---------------------------------------------------------------------------------------|---------------------|-------------------|---------------------------------------------------------|---------|----------------------------------|
|                                                                                       |                     |                   | Männer*                                                 | Frauen* |                                  |
| <b>Bitte keine Doppelzählungen!</b>                                                   |                     |                   |                                                         |         |                                  |
| Leitung** (ohne Stellvertretung)<br>Art des Abschlusses: .....                        |                     |                   |                                                         |         |                                  |
| Fachdienst Medizin                                                                    |                     |                   |                                                         |         |                                  |
| Fachdienst Psychologie<br>• davon approbiert                                          |                     |                   |                                                         |         |                                  |
| Fachdienst (Sozial-) Pädagogik<br>• davon mit Zusatzausbildung                        |                     |                   |                                                         |         |                                  |
| Sonstiger Fachdienst                                                                  |                     |                   |                                                         |         |                                  |
| Summe aller Fachdienststellen<br>(ohne Leitung)                                       |                     |                   |                                                         |         |                                  |
| AVD und Werkdienst (ohne evtl. in<br>der Verwaltung eingesetzte<br>Mitarbeiter/innen) |                     |                   |                                                         |         |                                  |
| Verwaltungsdienst einschl.<br>Bürodienst für sozialtherapeutische<br>Berichtsaufgaben |                     |                   |                                                         |         |                                  |

**Anmerkungen**

\*Bitte gehen Sie dabei von Vollzeitstellen aus. Teilzeitstellen können Sie entweder anteilig angeben (z.B. eine halbe Stelle = 0,5) oder zusammenzählen (z.B. eine Vollzeitstelle + zwei halbe Stellen + eine 40%-Stelle = 1 + 0,5 + 0,5 + 0,4 = 2,4).

\*\*Sofern die (verfügbare bzw. besetzte) Leitung nur einen Stellenteil ausmacht und ein anderer Teil als Fachdienst eingesetzt wird, erfassen Sie bitte beides nach den jeweiligen Anteilen, also etwa 0,4 bei „Leitung“ und 0,6 bei „Fachdienste“.

\*\*\*Durch Elternzeit, Erkrankung oder anders bedingte Abwesenheit der Stelleninhaberin/des Stelleninhabers, die mindestens 3 Monate anhält und für die *keine* Vertretung eingesetzt ist. Bitte auch hier den betreffenden Stellenanteil angeben.

**(13) Fand in der Zeit vom 01.04.2018 bis 31.03.2019 Supervision statt?**

Mehrfachnennungen möglich!

|                          |                                          |
|--------------------------|------------------------------------------|
| <input type="checkbox"/> | Nein                                     |
| <input type="checkbox"/> | Ja, und zwar (auch) Teamsupervision*     |
| <input type="checkbox"/> | Ja, und zwar (auch) Gruppensupervision** |
| <input type="checkbox"/> | Ja, und zwar (auch) Einzelsupervision*** |

**Sofern Supervision stattfand: Wie wurde diese finanziert?**

Mehrfachnennungen möglich!

|                                                        | Team                     | Gruppe                   | Einzel                   |
|--------------------------------------------------------|--------------------------|--------------------------|--------------------------|
| eigene Haushaltsmittel (der Sozialtherap. Einrichtung) | <input type="checkbox"/> | <input type="checkbox"/> | <input type="checkbox"/> |
| sonstige Haushaltsmittel (z.B. der Gesamtanstalt)      | <input type="checkbox"/> | <input type="checkbox"/> | <input type="checkbox"/> |
| private Finanzierung                                   | <input type="checkbox"/> | <input type="checkbox"/> | <input type="checkbox"/> |
| Sonstiges .....                                        | <input type="checkbox"/> | <input type="checkbox"/> | <input type="checkbox"/> |

**Anmerkungen**

|  |
|--|
|  |
|--|

\**Teamsupervision*: Alle Mitglieder des Behandlungsteams nehmen teil (im Fokus steht die Zusammenarbeit des Teams und die Interaktionen mit und zwischen den Strafgefangenen/Sicherungsverwahrten).

\*\**Gruppensupervision*: Nur ein Teil der Mitglieder des Behandlungsteams nimmt teil (im Fokus stehen meist Behandlungsfälle).

\*\*\*Eine *Einzelsupervision* (ein/e Supervisor/in und ein/e Supervisand/in) wird nur erfasst, wenn sie nicht vollständig in der Freizeit und auf Kosten des/der Supervisand/in stattfindet.

**(14) ARBEITS-/BEHANDLUNGSKONZEPT**

|                                  |                             |                               |
|----------------------------------|-----------------------------|-------------------------------|
| Datum des aktuellen Konzepts     | .....                       |                               |
| Ist eine Aktualisierung geplant? | ja <input type="checkbox"/> | nein <input type="checkbox"/> |

| <b>Anmerkungen und/oder Erläuterungen zu</b>         |                                          |
|------------------------------------------------------|------------------------------------------|
| <b>Veränderungen im vergangenen Jahr</b>             | <b>Planungen für das kommende Jahr</b>   |
| <br><br><br><br><br><br><br><br><br><br>             | <br><br><br><br><br><br><br><br><br><br> |
| <b>Sonstige Anmerkungen: Anregungen und Hinweise</b> |                                          |
| <br><br><br><br><br><br><br><br><br><br>             |                                          |

**Vielen Dank für Ihre Unterstützung!**

Bitte senden Sie den ausgefüllten Bogen postalisch, als Fax oder E-Mail-Anhang zurück an:

Kriminologische Zentralstelle  
Dr. Sonja Etzler  
Viktoriastraße 35  
65189 Wiesbaden  
Fax: 0611 / 1 57 58 - 10  
s.etzler@krimz.de

|                                |                                                                   |  |  |
|--------------------------------|-------------------------------------------------------------------|--|--|
| <b>KRIMZ</b>                   | <b>STICHTAGSERHEBUNG ZUM 31.03.2019</b>                           |  |  |
|                                | Zusatzbogen zur Behandlung in Sozialtherapeutischen Einrichtungen |  |  |
| <b>ZUSATZBOGEN: BEHANDLUNG</b> |                                                                   |  |  |

| KONTAKTDATEN der Sozialtherapeutischen Einrichtung               |                                                  |                                       |                                             |
|------------------------------------------------------------------|--------------------------------------------------|---------------------------------------|---------------------------------------------|
| Name                                                             | .....                                            |                                       |                                             |
| Art der Einrichtung                                              | Selbständige Anstalt<br><input type="checkbox"/> | Abteilung<br><input type="checkbox"/> | Sonstiges <input type="checkbox"/><br>..... |
| Geschlecht der Klientel                                          | männlich<br><input type="checkbox"/>             | weiblich<br><input type="checkbox"/>  |                                             |
| Art der Klientel                                                 | Ausschließlich nach JGG Verurteilte              | ja <input type="checkbox"/>           | nein <input type="checkbox"/>               |
| KONTAKTDATEN der Bearbeiterin / des Bearbeiters (für Rückfragen) |                                                  |                                       |                                             |
| Name                                                             | .....                                            |                                       |                                             |
| Berufsgruppe                                                     | .....                                            |                                       |                                             |
| Telefon                                                          | .....                                            |                                       |                                             |
| Email                                                            | .....                                            |                                       |                                             |

***Hinweise zum Ausfüllen***

- Bei diesem Bogen handelt es sich um eine Zusatzbefragung im Rahmen der Stichtagserhebung zur Zusammensetzung der Strafgefangenen und Sicherungsverwahrten der KrimZ.
- In diesem Zusatzbogen werden Gegebenheiten der therapeutischen Behandlung in Ihrer Sozialtherapeutischen Einrichtung erfragt.
- Bitte beziehen Sie Ihre Antworten auf den Zeitraum vom 1. April 2018 bis 31. März 2019.
- Bitte schicken Sie diesen Bogen zusammen mit dem Standardbogen bis zum 30. April 2019 zurück an die KrimZ.

Bei Fragen oder Hinweisen wenden Sie sich gerne an die Ansprechpartnerin

**Dr. Sonja Etzler**, Tel.: 0611 / 15758-21 (Di & Do von 09h-17h),

E-Mail: s.etzler@krimz.de

Sehr geehrte Damen und Herren,

auch in diesem Jahr möchten wir die Stichtagserhebung zur Sozialtherapie um eine Zusatzbefragung erweitern. In diesem Bogen geht es darum, zu erfassen, wie gesprächsorientierte Therapie (klassischerweise Psychotherapie) in sozialtherapeutischen Einrichtungen umgesetzt wird. Um ein umfassendes Bild zu erstellen, möchten wir Sie gerne bitten, acht folgende Fragen zu bearbeiten, die teilweise nur durch Schätzungen zu beantworten sind. Für eine einfachere Bearbeitung des Bogens raten wir, dass die Bearbeiterin oder der Bearbeiter mit der Koordination der durchgeführten gesprächsorientierten Therapie in der Einrichtung vertraut ist (z. B. der psychologische Fachdienst).

Unter **gesprächsorientierter Therapie** wird all die Behandlung verstanden,

1. die durch **Gespräche** vermittelt wird
2. die auf eine **Besserung der psychischen Gesundheit** und/oder auf die **Reduktion des Rückfallrisikos** abzielt

Klassischerweise ist dies **Psychotherapie** (nach PsychThG) im Einzel- oder Gruppensetting; weiter dazu gezählt werden aber auch Einzel- bzw. Gruppengesprächssitzungen, die durch nicht approbierte Psychologinnen und Psychologen oder Pädagoginnen und Pädagogen durchgeführt werden und der oben genannten Definition entsprechen.

Bei Rückfragen oder Anmerkungen sind wir gerne telefonisch oder per Email erreichbar.

Wir bedanken uns sehr herzlich für Ihre Mitarbeit und Mühe und verbleiben  
mit freundlichen Grüßen

Sonja Etzler

**1. Generelle therapeutische Ausrichtung der sozialtherapeutischen Einrichtung**

**Frage 1a.** Uns interessiert, welche **Ausrichtung** der gesprächsbasierten Behandlung im schriftlichen **Konzept** der sozialtherapeutischen Einrichtung vorgesehen ist. Falls hierzu nichts Genaues im Konzept steht, geben Sie dies bitte in der Antwort an.

**1a.** Welche **therapeutische Ausrichtung** verfolgt ihre sozialtherapeutische Einrichtung laut **Konzept**?

- Verhaltenstherapeutisch
- Tiefenpsychologisch fundiert
- Psychoanalytisch
- Systemisch
- Andere, nämlich \_\_\_\_\_
- Es wurde keine therapeutische Ausrichtung im Konzept festgelegt

**Frage 1b.** Manchmal wird in der therapeutischen Praxis auf Elemente verschiedener Ausrichtungen der Behandlung zurückgegriffen (z. B. Elemente der Verhaltenstherapie und der Psychoanalyse), je nachdem, welche Bedürfnisse der Patient mit sich bringt. Daher bitten wir Sie in Frage 1b **in Prozenten** anzugeben, welche Elemente in die gesprächsbasierte Therapie einfließen. Falls Sie ausschließlich eine Ausrichtung verfolgen, geben Sie hier 100% an. Bitte beachten Sie, dass es sich hier um **Schätzwerte** handelt.

**1b.** Berücksichtigen Sie die gesprächsbasierte Therapie in Ihrer Einrichtung **in der Praxis**: Aus welchen therapeutischen Ausrichtungen finden sich Elemente? Bitte geben Sie dies **anteilig** an. Schätzwerte reichen aus.

Falls nur eine Ausrichtung verfolgt wird, nennen Sie bitte 100%

- \_\_\_% Verhaltenstherapeutisch
- \_\_\_% Tiefenpsychologisch fundiert
- \_\_\_% Psychoanalytisch
- \_\_\_% Systemisch
- \_\_\_% Andere, nämlich \_\_\_\_\_

**2. Angestellte Psychologinnen und Psychologen in der sozialtherapeutischen Einrichtung**

**Frage 2a.** Bitte geben Sie an, wie viele Psychologinnen und Psychologen in der sozialtherapeutischen Einrichtung zum Stichtag 31.03. angestellt sind. Außerdem interessiert uns, ob sie die Ausbildung zum psychologischen Psychotherapeut/in absolvieren oder bereits approbiert sind.

**Beispiel:** Ein Psychologe arbeitet 50% der regulären Arbeitszeit und befindet sich in Ausbildung zum Psychologischen Psychotherapeuten. Dann geben Sie bitte in der Zeile *In Ausbildung* und der Spalte *Männer* bzw. der Spalte *Anzahl Personen* 1 an sowie in der Spalte *Stellenanteil* (**0,5 Stelle**) an.

|                                                                                                                          |                        |                 |               |                 |               |       |
|--------------------------------------------------------------------------------------------------------------------------|------------------------|-----------------|---------------|-----------------|---------------|-------|
| 2a. <b>Wie viele</b> Psychologinnen und Psychologen sind <b>insgesamt</b> in Ihrer Einrichtung zum Stichtag beschäftigt? | Fachdienst Psychologie | Frauen          |               | Männer          |               |       |
|                                                                                                                          |                        | Anzahl Personen | Stellenanteil | Anzahl Personen | Stellenanteil | Summe |
|                                                                                                                          | Nicht approbiert       |                 |               |                 |               |       |
|                                                                                                                          | In Ausbildung          |                 |               |                 |               |       |
|                                                                                                                          | Approbiert             |                 |               |                 |               |       |
|                                                                                                                          | Summe                  |                 |               |                 |               |       |

**Frage 2b.** Wir möchten gerne erfassen, **in welcher therapeutischen Ausrichtung** die fest angestellten Psychologinnen und Psychologen ihre Ausbildung absolvieren. Hier geben Sie bitte in der passenden Zeile die Personenanzahl an.

|                                                                                                          |                                                                                                                                                                                 |
|----------------------------------------------------------------------------------------------------------|---------------------------------------------------------------------------------------------------------------------------------------------------------------------------------|
| 2b. Von den <b>Psychologinnen und Psychologen in Ausbildung</b> , welche Ausrichtung hat die Ausbildung? | __ Personen verhaltenstherapeutisch<br>__ Personen tiefenpsychologisch fundiert<br>__ Personen psychoanalytisch<br>__ Personen systemisch<br>__ Personen andere, nämlich: _____ |
|----------------------------------------------------------------------------------------------------------|---------------------------------------------------------------------------------------------------------------------------------------------------------------------------------|

**Frage 2c.** Zuletzt möchten wir die therapeutische Ausrichtung der approbierten Psychologinnen und Psychologen erfassen, die in der sozialtherapeutischen Einrichtung fest angestellt sind. Geben Sie bitte auch hier nur die Personenanzahl an.

|                                                                                                                                |                                                                                                                                                                                 |
|--------------------------------------------------------------------------------------------------------------------------------|---------------------------------------------------------------------------------------------------------------------------------------------------------------------------------|
| c. In welcher therapeutischen Ausrichtung sind die <b>approbierten Psychotherapeutinnen und Psychotherapeuten</b> ausgebildet? | __ Personen verhaltenstherapeutisch<br>__ Personen tiefenpsychologisch fundiert<br>__ Personen psychoanalytisch<br>__ Personen systemisch<br>__ Personen andere, nämlich: _____ |
|--------------------------------------------------------------------------------------------------------------------------------|---------------------------------------------------------------------------------------------------------------------------------------------------------------------------------|

**Kontrollieren** Sie am Ende, ob die Angaben in den Fragen 2a, 2b und 2c übereinstimmen.

**3. Externe Psychologinnen und Psychologen, die Gefangene behandeln**

**Frage 3a.** Bitte geben Sie an, wie viele **Psychologinnen und Psychologen** von **extern** in die sozialtherapeutische Einrichtung kommen, um zu behandeln. Bitte geben Sie in Klammern an, für **wie viele Stunden pro Woche** die Psychologinnen und Psychologen in die sozialtherapeutische Einrichtung kommen (eine Sitzung von 50 min. zählt als eine Zeitstunde).

**Beispiel:** Psychologische Psychotherapeutin Musterfrau kommt von extern für 3 Sitzungen in der Woche. Bitte geben Sie dann an bei *Approbiert* und *Frauen* in der Spalte *Anzahl* 1 und in der Spalte *h/Woche* 3 an. Hierbei spielt es keine Rolle, wie viele Patienten behandelt wurden.

|                                                                                                                                                                                         |                                |        |         |        |         |       |
|-----------------------------------------------------------------------------------------------------------------------------------------------------------------------------------------|--------------------------------|--------|---------|--------|---------|-------|
| 3a. Wie viele <b>Psychologinnen und Psychologen</b> kommen von <b>extern</b> , um Gefangene der sozialtherapeutischen Einrichtung zu behandeln?<br><br>Wie viele Stunden behandeln sie? |                                | Frauen |         | Männer |         |       |
|                                                                                                                                                                                         | Psychologinnen und Psychologen | Anzahl | h/Woche | Anzahl | h/Woche | Summe |
|                                                                                                                                                                                         | Nicht approbiert               |        |         |        |         |       |
|                                                                                                                                                                                         | Approbiert                     |        |         |        |         |       |
|                                                                                                                                                                                         | Summe                          |        |         |        |         |       |

**Frage 3b.** Geben Sie bitte an, in **welcher Ausrichtung** die externen Psychologinnen und Psychologen approbiert sind. Geben Sie die Anzahl der Personen an.

|                                                                                                                                                                       |                                                                                                                                                                                      |
|-----------------------------------------------------------------------------------------------------------------------------------------------------------------------|--------------------------------------------------------------------------------------------------------------------------------------------------------------------------------------|
| 3b. In welcher <b>Ausrichtung</b> sind die <b>externen</b> Psychotherapeutinnen und Psychotherapeuten ausgebildet?<br><br>Bitte geben Sie die Anzahl der Personen an. | ___ Personen verhaltenstherapeutisch<br>___ Personen tiefenpsychologisch fundiert<br>___ Personen psychoanalytisch<br>___ Personen systemisch<br>___ Personen andere, nämlich: _____ |
|-----------------------------------------------------------------------------------------------------------------------------------------------------------------------|--------------------------------------------------------------------------------------------------------------------------------------------------------------------------------------|

**Kontrollieren** Sie am Ende, ob die Angaben in Frage 3a und in Frage 3b übereinstimmen.



**4. Angestellte (sozial-) pädagogische und andere Therapeutinnen und Therapeuten in sozialtherapeutischen Einrichtungen**

**Frage 4a.** Gerne möchten wir erfragen, ob in Ihrer sozialtherapeutischen Einrichtung (**Sozial-) Pädagoginnen und Pädagogen oder andere Fachdienste** angestellt sind, die mit den Gefangenen gesprächsbasiert therapeutisch arbeiten. Bitte zählen Sie hierbei *nur* die Personen, die Therapie im Einzel- oder Gruppensetting anbieten.

Bitte erinnern Sie, dass mit gesprächsbasierter Therapie Sitzungen gemeint sind, die

- durch Gespräche vermittelt und
- zur Besserung der psychischen Gesundheit bzw. Rückfallrisikoreduktion eingesetzt werden.

Nach dieser Definition zählen z. B. Suchtpräventionsprogramme als gesprächsbasierte Therapie, nicht jedoch Freizeitgestaltung oder Sportangebote. Geben Sie die Anzahl der Personen an, die in der sozialtherapeutischen Einrichtung angestellt sind und gesprächsbasierte Therapie anbieten.

|                                                                                                                                                                                                                                                            |                                   |        |        |       |
|------------------------------------------------------------------------------------------------------------------------------------------------------------------------------------------------------------------------------------------------------------|-----------------------------------|--------|--------|-------|
| 4a. Wie viele ( <b>sozial-) pädagogische und andere Therapeutinnen und Therapeuten</b> sind in der sozialtherapeutischen Einrichtung <b>angestellt</b> und bieten gesprächsbasierte Therapie an?<br><br>Bitte geben Sie die <b>Anzahl der Personen</b> an. |                                   | Frauen | Männer | Summe |
|                                                                                                                                                                                                                                                            | Fachdienst<br>(Sozial-) Pädagogik |        |        |       |
|                                                                                                                                                                                                                                                            | Andere Fachdienste<br>_____       |        |        |       |
|                                                                                                                                                                                                                                                            | Summe                             |        |        |       |

**Frage 4b.** Darüber hinaus möchten wir Sie gerne bitten, die gesprächstherapeutischen Angebote aufzulisten, die durch Ihre Fachdienste angeboten werden in Frage 4b.

|                                                    |                                                 |
|----------------------------------------------------|-------------------------------------------------|
| 4b. Welche <b>Interventionen</b> werden angeboten? | <hr/> <hr/> <hr/> <hr/> <hr/> <hr/> <hr/> <hr/> |
|----------------------------------------------------|-------------------------------------------------|

**5. Externe (sozial-) pädagogische und andere Therapeutinnen und Therapeuten**

**Frage 5a.** Gerne möchten wir erfragen, ob **externe** (sozial-) pädagogische oder andere Therapeutinnen und Therapeuten in die Einrichtung kommen, die mit den Gefangenen gesprächsbasiert arbeiten. Bitte zählen Sie hierbei *nur* die Personen, die gesprächsbasierte Therapie im Einzel- oder Gruppensetting anbieten.

Bitte erinnern Sie, dass mit gesprächsbasierter Therapie Sitzungen gemeint sind, die

- durch Gespräche vermittelt und
- zur Besserung der psychischen Gesundheit bzw. Rückfallrisikoreduktion eingesetzt werden.

Nach dieser Definition zählen z. B. Suchtpräventionsprogramme als gesprächsbasierte Therapie, nicht jedoch Freizeitgestaltung oder Sportangebote. Geben Sie die Anzahl der Personen an, die von extern in die sozialtherapeutische Einrichtung kommen und gesprächsbasierte Therapie anbieten.

|                                                                                                                                                                                                                           |                                                | Frauen | Männer | Summe |
|---------------------------------------------------------------------------------------------------------------------------------------------------------------------------------------------------------------------------|------------------------------------------------|--------|--------|-------|
| <b>5a. Wie viele (sozial-) pädagogische und andere Therapeutinnen und Therapeuten kommen von extern, um gesprächsbasierte Einzel- oder Gruppentherapie anzubieten?</b><br><br>Bitte geben Sie die Anzahl der Personen an. | (Sozial-) Pädagoginnen und (Sozial-) Pädagogen |        |        |       |
|                                                                                                                                                                                                                           | Andere<br>_____                                |        |        |       |
|                                                                                                                                                                                                                           | Summe                                          |        |        |       |
|                                                                                                                                                                                                                           |                                                |        |        |       |

**Frage 5b.** Darüber hinaus möchten wir Sie gerne bitten, die **gesprächsbasierten therapeutischen Angebote** aufzulisten, die durch externe (sozial-) pädagogischen oder anderen Therapeutinnen und Therapeuten angeboten werden.

|                                                    |                                           |
|----------------------------------------------------|-------------------------------------------|
| <b>5b. Welche Interventionen werden angeboten?</b> | <hr/> <hr/> <hr/> <hr/> <hr/> <hr/> <hr/> |
|----------------------------------------------------|-------------------------------------------|

**6. Anzahl der gesprächsbasierten Therapiestunden pro Woche**

**Frage 6a.** Gerne möchten wir in diesem Abschnitt erfahren, **wie viele** gesprächsbasierte Behandlungsstunden eine Person ungefähr **pro Woche** erhält. Diese Frage kann durch eine **Schätzung** beantwortet werden.

|                                                                                               |                       |
|-----------------------------------------------------------------------------------------------|-----------------------|
| 6a. Wie viele gesprächsbasierte Therapiestunden erhält ein Patient pro Woche im Durchschnitt? | ___ Stunden pro Woche |
|-----------------------------------------------------------------------------------------------|-----------------------|

**Frage 6b.** Im Anschluss daran möchten wir gerne erfragen, wie viel Prozent der Therapiestunden schätzungsweise ausfallen, obwohl sie geplant waren.

|                                                                                                                                  |                           |
|----------------------------------------------------------------------------------------------------------------------------------|---------------------------|
| 6b. Wie viele gesprächsbasierte Therapiestunden fallen schätzungsweise durchschnittlich pro Woche aus, obwohl sie geplant waren? | ___ % der Therapiestunden |
|----------------------------------------------------------------------------------------------------------------------------------|---------------------------|

**7. Aufenthaltsdauer der Gefangenen, die im Berichtsjahr die sozialtherapeutische Einrichtung verlassen haben**

**Frage 7a.** In diesem Abschnitt möchten wir gerne die Aufenthaltsdauer der Gefangenen erfragen, die **im Berichtsjahr** die sozialtherapeutische Einrichtung **verlassen** haben. Hierbei spielt es keine Rolle, aus welchem Grund der Abgang des Gefangenen erfolgte.

**7a. Aufenthaltsdauer der Gefangenen nach Abgang**

|                                                | Anzahl Personen |
|------------------------------------------------|-----------------|
| Abgänge insgesamt                              |                 |
| Aufenthalt <6 Monate                           |                 |
| Aufenthalt/Behandlung ≥ 6 Monate bis <1 Jahr   |                 |
| Aufenthalt/Behandlung ≥ 1 Jahr bis < 2 Jahre   |                 |
| Aufenthalt/Behandlung ≥ 2 Jahre bis < 3 Jahre  |                 |
| Aufenthalt/Behandlung ≥ 3 Jahre bis < 4 Jahre  |                 |
| Aufenthalt/Behandlung ≥ 4 Jahre bis <5 Jahre   |                 |
| Aufenthalt/Behandlung ≥ 5 Jahre bis < 6 Jahre  |                 |
| Aufenthalt/Behandlung ≥ 6 Jahre bis <7 Jahre   |                 |
| Aufenthalt/Behandlung ≥ 7 Jahre bis < 8 Jahre  |                 |
| Aufenthalt/Behandlung ≥ 8 Jahre bis < 9 Jahre  |                 |
| Aufenthalt/Behandlung ≥ 9 Jahre bis < 10 Jahre |                 |
| Aufenthalt/Behandlung ≥ 10 Jahre und mehr      |                 |

**Frage 7b.** Entspricht die Aufenthaltsdauer in der sozialtherapeutischen Einrichtung der Behandlungsdauer?

|                                                           |                                                                                                                                       |
|-----------------------------------------------------------|---------------------------------------------------------------------------------------------------------------------------------------|
| 7b. Entspricht die Aufenthaltsdauer der Behandlungsdauer? | <input type="checkbox"/> <b>Ja</b> , die Behandlung wird in der Regel <b>unmittelbar</b> nach der Aufnahme begonnen                   |
|                                                           | <input type="checkbox"/> <b>Nein</b> , die Behandlung wird in der Regel aber <b>innerhalb von 4 Wochen</b> nach der Aufnahme begonnen |
|                                                           | <input type="checkbox"/> <b>Nein</b> , die Behandlung wird in der Regel <b>nach mehr als 4 Wochen</b> nach der Aufnahme begonnen      |

### 8. Mögliche Verbesserungen therapeutischer Arbeit

Zuletzt möchten wir Sie bitten, uns Ihre Einschätzung darüber zu geben, welche Verbesserungen für die Zukunft der Sozialtherapie erstrebenswert wären.

**Frage 8a.** Welche **Änderungen im sozialtherapeutischen Alltag** würden helfen, das therapeutische Arbeiten weiter zu verbessern?

---

---

---

**Frage 8b.** Wie könnte Ihrer Meinung nach die Wirksamkeit der Therapie in der Sozialtherapie noch gesteigert werden?

---

---

---

**Vielen Dank für Ihre Unterstützung!**

Bitte senden Sie den ausgefüllten Bogen (inklusive Standardbogen) postalisch, als Fax oder

E-Mail-Anhang bis **30.04.2019** zurück an:

Kriminologische Zentralstelle

Dr. Sonja Etzler

Viktoriastraße 35

65189 Wiesbaden

Fax: 0611 / 1 57 58 - 10

s.etzler@krimz.de
