# Supplementary material for: Merkmale und Perspektiven der (psycho–)therapeutischen Behandlung im Justizvollzug
Source: Atypon-hosted journal article supplement (doi:10.1026/1616-3443/a000655), 2022-01-01
Supplement: 1616-3443_a000655_esm2.pdf [file 1616-3443_a000655_esm2.pdf]

*Anteile der Ausrichtungen an Kombinationen der Therapeutischen Ausrichtungen in den SothEn in der Praxis (ESM 2)*

| Ausrichtungen          | Einrichtungen (n) | Spannweite | Min. | Max. | MW    |
|------------------------|-------------------|------------|------|------|-------|
| VT + TP + SYS          | 16                |            |      |      |       |
| VT                     |                   | 40%        | 40%  | 80%  | 60.0% |
| TP                     |                   | 40%        | 5%   | 45%  | 21.0% |
| SYS                    |                   | 25%        | 5%   | 30%  | 19.0% |
| VT                     | 13                | 0%         | 100% | 100% | 100%  |
| VT + SYS               | 9                 |            |      |      |       |
| VT                     |                   | 60%        | 30%  | 90%  | 64.0% |
| SYS                    |                   | 60%        | 10%  | 70%  | 36.0% |
| VT + TP + SYS + Andere | 8                 |            |      |      |       |
| VT                     |                   | 45%        | 25%  | 70%  | 59.4% |
| TP                     |                   | 15%        | 10%  | 25%  | 14.4% |
| SYS                    |                   | 15%        | 10%  | 25%  | 13.1% |
| Andere                 |                   | 20%        | 5%   | 25%  | 13.1% |
| VT + TP                | 7                 |            |      |      |       |
| VT                     |                   | 30%        | 50%  | 80%  | 60.0% |
| TP                     |                   | 30%        | 20%  | 50%  | 40.0% |
| VT + Andere            | 3                 |            |      |      |       |
| VT                     |                   | 25%        | 70%  | 95%  | 84.2% |
| Andere                 |                   | 25%        | 5%   | 30%  | 15.8% |
| VT + TP + Andere       | 3                 |            |      |      |       |
| VT                     |                   | 30%        | 50%  | 80%  | 63.3% |
| TP                     |                   | 5%         | 15%  | 20%  | 18.3% |
| Andere                 |                   | 25%        | 5%   | 30%  | 18.3% |
| VT + SYS + Andere      | 3                 |            |      |      |       |
| VT                     |                   | 30%        | 60%  | 90%  | 78.3% |
| SYS                    |                   | 15%        | 5%   | 20%  | 10.0% |
| Andere                 |                   | 15%        | 5%   | 20%  | 11.7% |
| VT + TP + PA + SYS     | 3                 |            |      |      |       |
| VT                     |                   | 20%        | 20%  | 40%  | 30.0% |
| TP                     |                   | 20%        | 30%  | 50%  | 36.7% |
| PA                     |                   | 20%        | 10%  | 30%  | 20.0% |
| SYS                    |                   | 10%        | 10%  | 20%  | 13.3% |
| VT + TP + PA           | 2                 |            |      |      |       |
| VT                     |                   | 40%        | 40%  | 80%  | 60.0% |
| TP                     |                   | 40%        | 10%  | 50%  | 30.0% |
| PA                     |                   | 0%         | 10%  | 10%  | 10.0% |
| TP                     | 1                 | 0%         | 100% | 100% | 100%  |
| Keine                  | 1                 | 0%         | 100% | 100% | 100%  |

*Anmerkung.* VT = Verhaltenstherapie. TP = Tiefenpsychologisch fundiert. SYS = Systemisch. PA = Psychoanalytisch. Andere = Andere Ausrichtung. Keine = Keine Ausrichtung
